# Supplementary material for: Data-driven super-resolution optoacoustic imaging via physically encoded signal acquisition
Source: Research Square preprint supplement (doi:10.21203/rs.3.rs-9315822/v1), 2026-06-03
Supplement: Supplementary file 1 [file 8c72d8a405fd9c07cfc84069.pdf]

1 **Supplementary information for**  
2 **Data-driven super-resolution optoacoustic imaging**  
3 **via physically encoded signal acquisition**

4 Irene Pi – Martín<sup>1</sup>, Daniil Nozdriukhin<sup>2</sup>, Alejandro Cebrecos<sup>1</sup>, Juan José García – Garrigós<sup>1</sup>,  
5 Daniel Razansky<sup>2</sup>, Xose Luis Dean – Ben<sup>2\*</sup>.

6 <sup>1</sup> Instituto de Instrumentación para Imagen Molecular (i3M), CSIC – Universitat Politècnica de València,  
7 Camino de Vera S/N, 46022, Valencia, Spain

8 <sup>2</sup> Institute for Biomedical Engineering, Department of Information Technology and Electrical Engineering,  
9 ETH Zurich, Zurich, Switzerland

10 \* email: [xl.deanben@pharma.uzh.ch](mailto:xl.deanben@pharma.uzh.ch); [xdeanben@ethz.ch](mailto:xdeanben@ethz.ch)

11

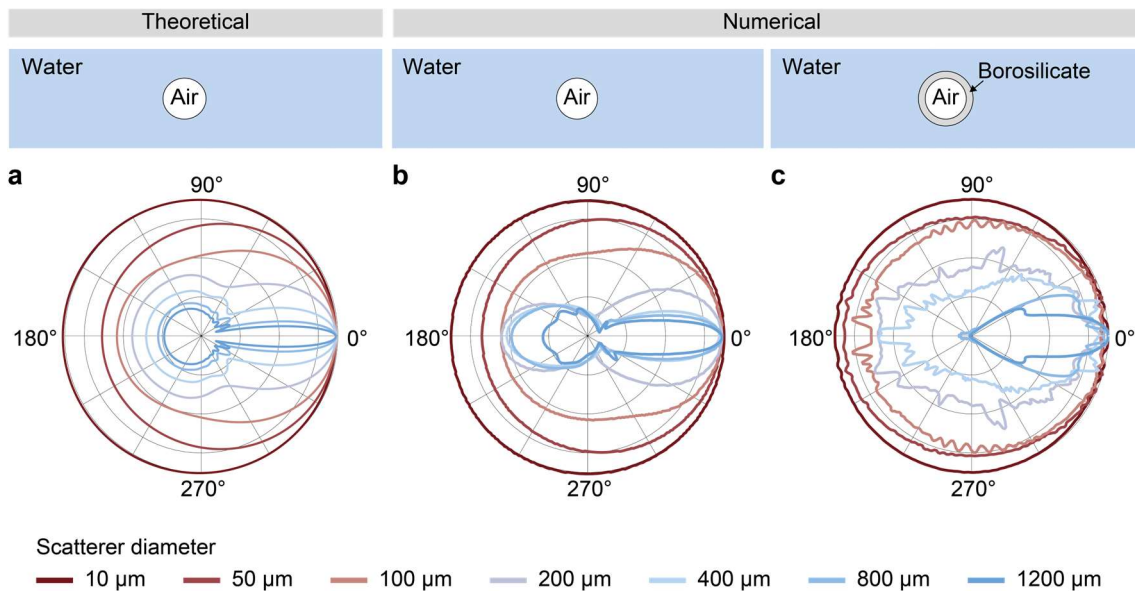

12

13 **Supplementary Figure 1. Acoustic scattering regimes.** (a) Theoretical acoustic scattering  
14 produced by cylindrical scatterers of different sizes, spanning regimes from Rayleigh to Mie  
15 scattering. (b) Numerically computed acoustic scattering from air cylindric scatterers, considering  
16 a central frequency of 5 MHz and 80% bandwidth (BW). (c) Numerically computed acoustic  
17 scattering from scatterers consisting of air enclosed by a borosilicate wall, under the same  
18 excitation conditions (5 MHz and 80% BW). The presence of the wall introduces an additional  
19 impedance contrast and structural resonance effects, leading to a more complex response that  
20 better resembles the experimental situation.

21

22

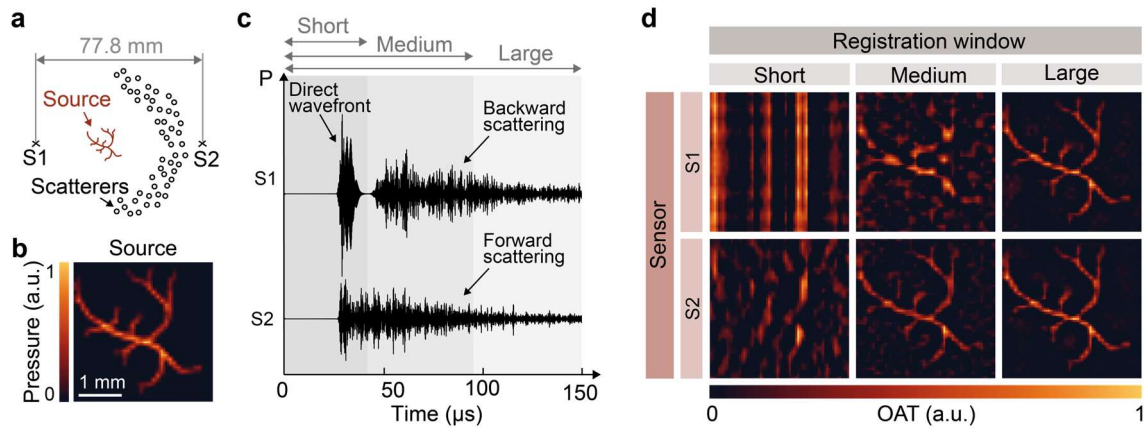

23

24 **Supplementary Figure 2. Physical encoding in model-based optoacoustic reconstruction.** (a)  
 25 Schematic of the numerical validation framework for model-based optoacoustic (OA)  
 26 tomography employing a single sensor (S1 or S2) and an acoustically scattering medium that  
 27 physically encodes the OA signals. (b) Initial pressure distribution employed as the OA source in  
 28 the numerical simulation. (c) S1 and S2 recorded signals when the sensors are positioned as  
 29 indicated in panel (a). (d) Model-based reconstructions based on the signals recorded by sensors  
 30 S1 (top row) and S2 (bottom row), using recording windows of increasing duration (short,  
 31 medium, and long) from left to right, as indicated in (c).

32

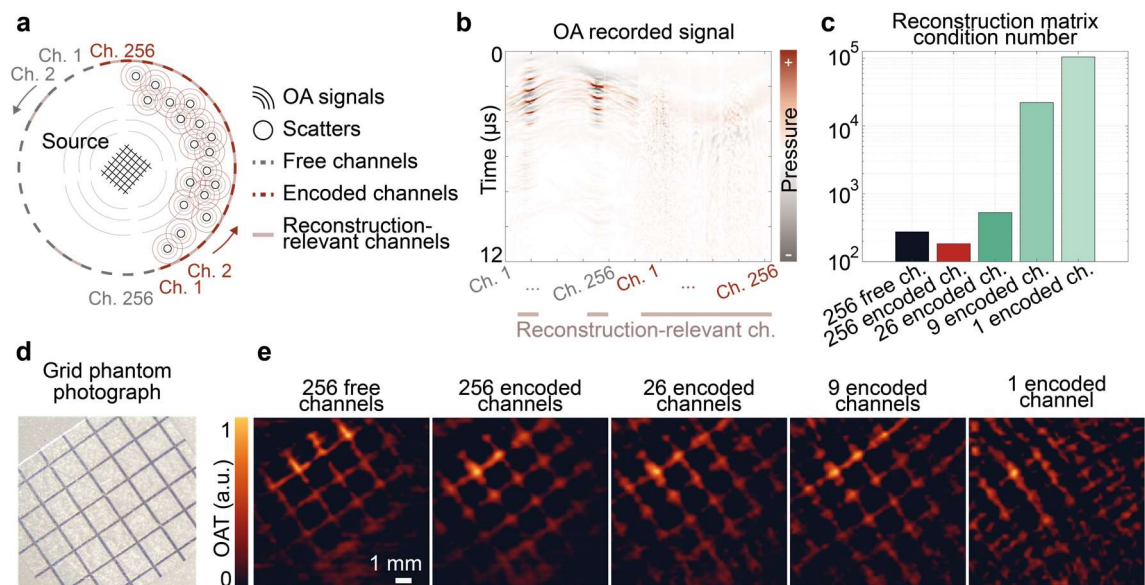

33

34 **Supplementary Figure 3. Expansion of reconstruction-relevant channels via scatter-**  
 35 **mediated signal redirection in optoacoustic tomography.** (a) Schematic of the grid phantom  
 36 experiment. The generated OA signals exhibit maximum perpendicular directivity, restricting the  
 37 relevant reconstruction channels to two narrow sectors in the scatter-free half ring (gray). The  
 38 scatterers redirect the signals, expanding them throughout the encoded half ring (red). (b) OA  
 39 signals recorded in the experiment shown in panel (a). (c) Reconstruction matrix condition  
 40 number for 256 scatter-free channels, and 256, 26, 9, and 1 encoded channels. (d) Photograph of  
 41 the grid phantom. (e) OAT reconstructions using the 256 scatter-free channels, and 256, 26, 9, and  
 42 1 encoded channels.

43

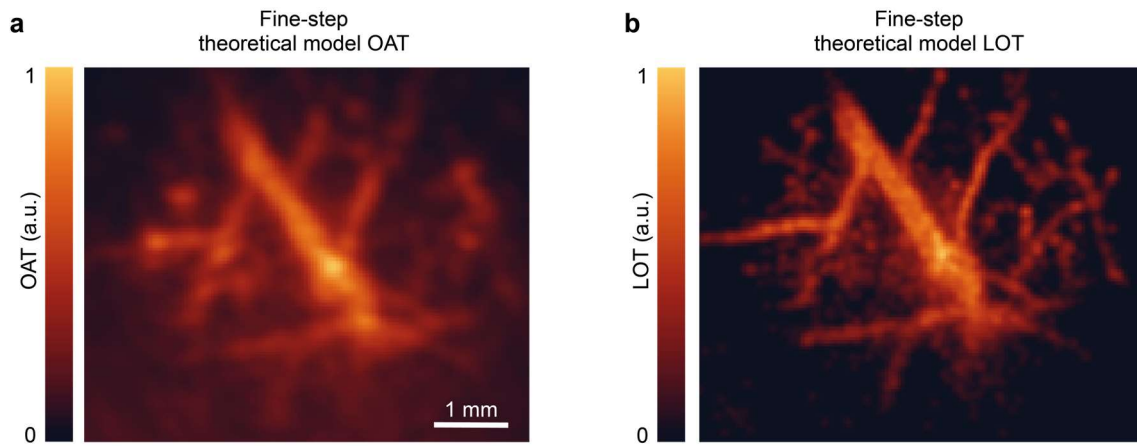

45

46 **Supplementary Figure 4. Standard optoacoustic reconstruction method.** (a) OAT image  
 47 reconstructed using the theoretical fine-step (36.1  $\mu\text{m}$ ) free half-ring model, the OA signal  
 48 originates from the laser excitation of the mouse vasculature prior to contrast agent injection. (b)  
 49 LOT image based on reconstructions performed with the fine-step free half-ring theoretical  
 50 model.

51

52

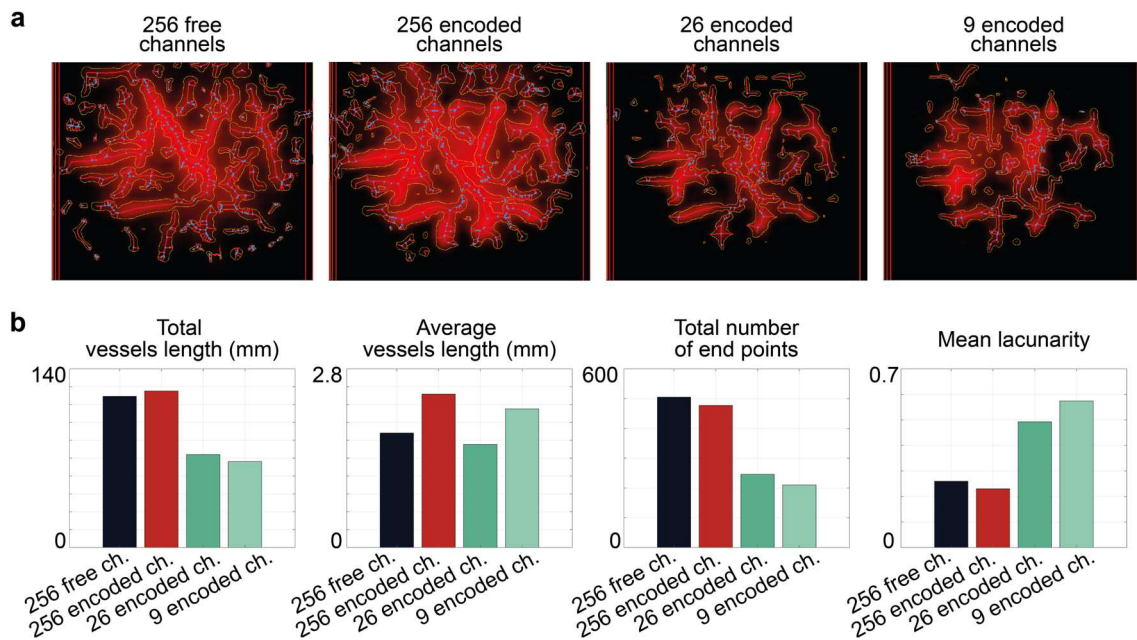

53

54 **Supplementary Figure 5. Angiographic analysis.** (a) Vascular network analysis using  
 55 AngioTool, showing vessel traces (red lines) and junctions (blue points) for different  
 56 reconstruction configurations. From left to right: 256 free channels, and 256, 26, and 9  
 57 encoded channels. (b) Quantitative angiogenesis-related metrics (from left to right: total vessel length,  
 58 mean vessel length, total number of endpoints, and mean lacunarity) derived from the vascular  
 59 analysis shown in panel (a).

60

61

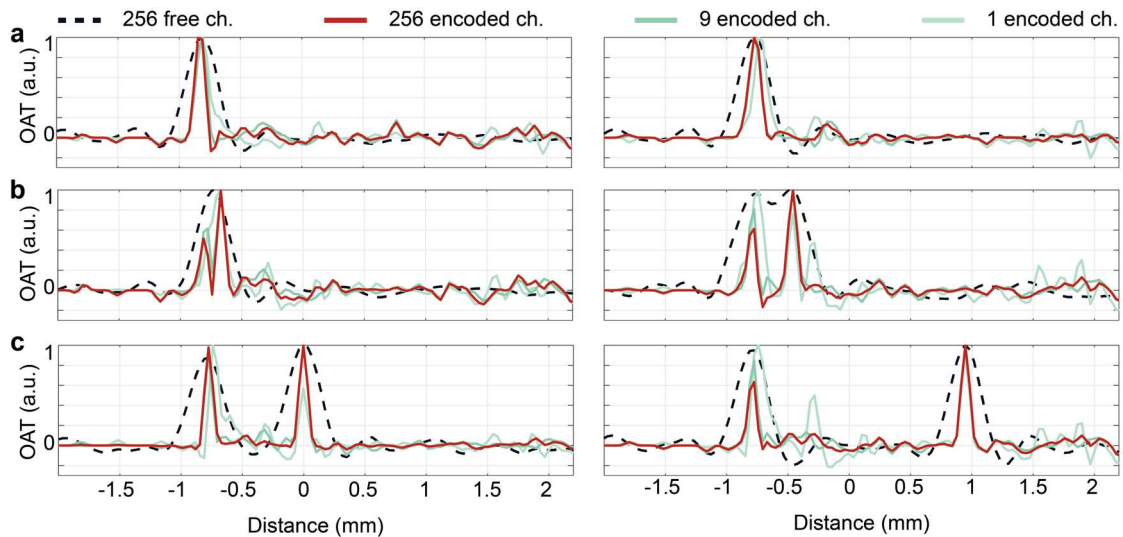

62

63 **Supplementary Figure 6. Resolution of closely spaced microparticles using self-calibrated**  
 64 **optoacoustic reconstruction.** One-dimensional self-calibrated reconstructed profiles for two  
 65 microparticles flowing through a tubing, obtained using standard optoacoustic tomography (OAT)  
 66 reconstruction and a self-calibrated model based on encoded channels. (a) The inter-particle  
 67 distance is below the system's resolving capability, resulting in an unresolved, merged signal. (b)  
 68 With a moderate increase in inter-particle separation, partial resolution is achieved, and the two  
 69 microparticles become distinguishable using the self-calibrated approach. (c) At larger  
 70 separations, the microparticles are fully resolved as two distinct peaks.

71

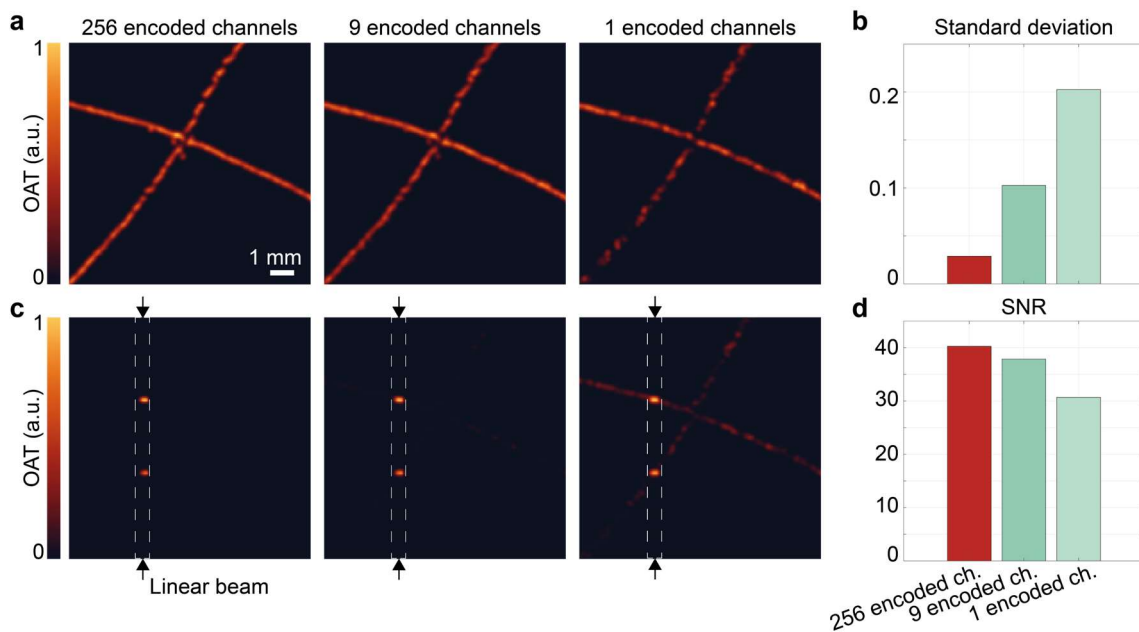

72

73 **Supplementary Figure 7. Self-calibrated phantom.** (a) Cross-shaped phantom consisting of  
 74 two intersecting surgical sutures embedded in uniformly illuminated agar, reconstructed using  
 75 256, 9, and 1 encoded channels with a self-calibrated model-based approach. (b) Standard  
 76 deviation maps corresponding to the three reconstructions shown in panel (a). (c) Reconstructions  
 77 obtained with 256, 9, and 1 channels under line-beam excitation, where the cross is illuminated  
 78 only at two points, generating two localized optoacoustic (OA) point sources. (d) Signal-to-noise  
 79 ratio (SNR) for the three cases shown in (c), where the signal is defined as the OA point sources  
 80 and the noise corresponds to the remaining signal within the calibrated region (i.e., the cross).

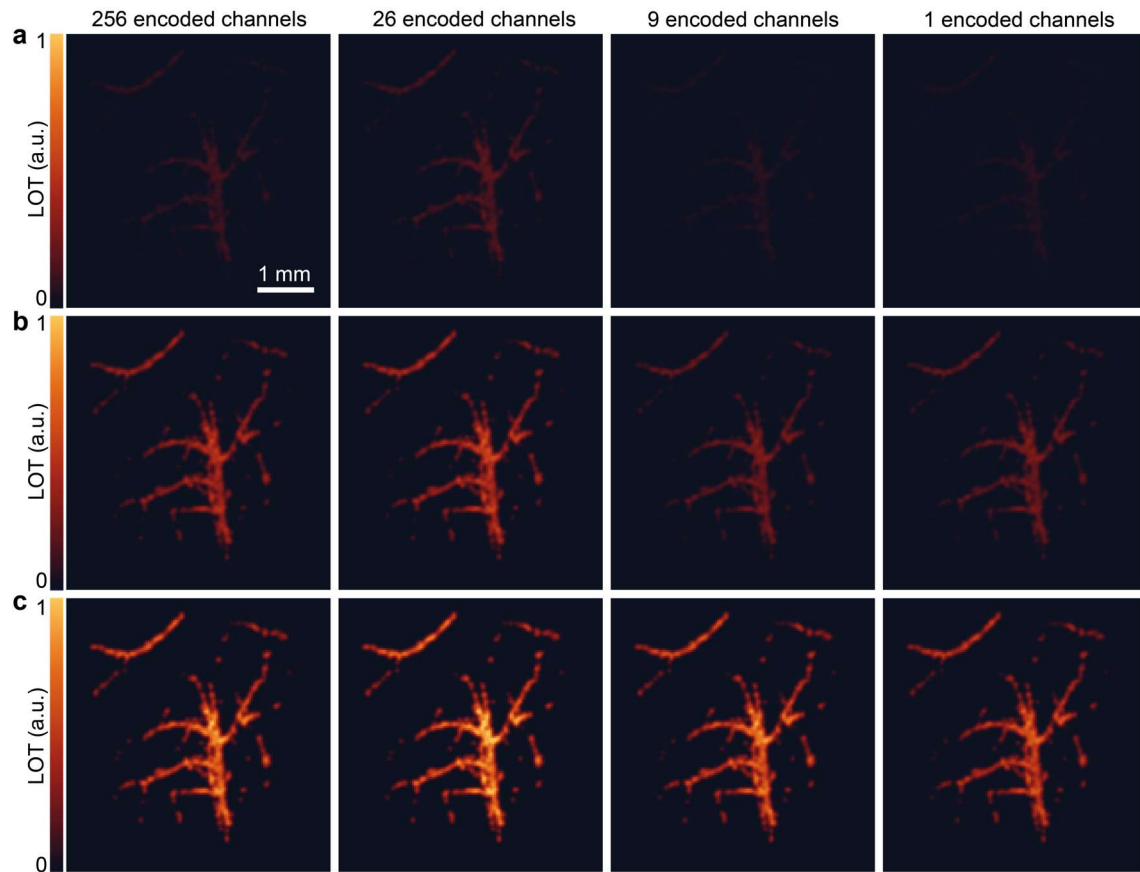

81

82 **Supplementary Figure 8. *In vivo* localization optoacoustic tomography (LOT)**  
 83 **reconstructions obtained using the self-calibrated method.** Columns show results  
 84 reconstructed with 256, 26, 9, and 1 encoded channels (from left to right). Rows correspond to  
 85 different acquisition times: (a) short acquisition time (400 stacked frames), (b) intermediate  
 86 acquisition time (900 stacked frames), and (c) long acquisition time (1500 stacked frames).

87
